# Supplementary material for: An Evaluation to Determine the Strongest CD4 Count Covariates during HIV Disease Progression in Women in South Africa
Source: Springer Nature journal article supplement (doi:10.1007/s40121-019-0235-4), 2019-02-12

## Supplementary Information

**File S1. Data used for the plots of the variable selection**

**Fig S1. The optimal principal component**

**Fig S2: Variable selection.** All three VIP cut off points are shown 0.8 (red), 1.0 (orange) and 1.5 (green). The vertical broken grey lines indicate  $|\beta_{pls}| < 0.025$ , the region within which the variables have less predictive power even if they have a higher VIP score.

| covariate      | VIP         | Loadings     | Coefficients | corr_cd4_r | corr_cd4_p |
|----------------|-------------|--------------|--------------|------------|------------|
| red_cells      | 0.857940555 | -0.217343662 | -0.165902182 | 0.1081     | 0          |
| haematocrit    | 1.407822146 | -0.024114176 | 0.049524278  | 0.2337     | 0          |
| mcv            | 1.347440569 | 0.28572096   | 0.317800115  | 0.1698     | 0          |
| mchc           | 0.885934469 | 0.013203523  | 0.096842018  | 0.097      | 0          |
| rdw            | 0.234781831 | -0.041171465 | -0.211986424 | -0.1332    | 0          |
| platelet       | 1.107183251 | 0.094439854  | 0.092154341  | 0.155      | 0          |
| neutrophils    | 0.609718532 | 0.04668982   | 0.116615391  | 0.126      | 0          |
| lymphocytes    | 3.559955678 | 0.289071204  | 0.079860318  | 0.5421     | 0          |
| monocytes      | 1.074237131 | -0.139346301 | 0.037585607  | 0.1547     | 0          |
| eosinophils    | 0.579917078 | -0.029988494 | -0.006988981 | 0.081      | 0          |
| basophils      | 1.825638814 | -0.11544204  | -0.105041758 | 0.1353     | 0          |
| ldl            | 0.454814315 | -0.097840632 | 0.047573411  | 0.0786     | 0          |
| triglycerides  | 0.632590412 | -0.067611492 | 0.099628861  | 0.0399     | 0.014      |
| glucose        | 0.963436822 | 0.333456917  | 0.167897992  | -0.1233    | 0          |
| alt_gpt        | 0.157007466 | 0.032415058  | 0.067195185  | -0.0349    | 0.0315     |
| ast_got        | 0.59307569  | 0.028853716  | 0.040535562  | -0.1355    | 0          |
| bilirubin      | 0.35681387  | -0.093728911 | -0.094900976 | 0.0467     | 0.004      |
| alkaline_phos  | 1.35497892  | 0.200344397  | 0.267117091  | 0.1154     | 0          |
| glutamyl_trans | 0.27447196  | -0.049780339 | -0.041474026 | -0.0601    | 0.0002     |
| calcium        | 0.942787119 | -0.266531174 | -0.298540748 | 0.0288     | 0.0762     |
| chloride       | 0.547690604 | -0.145323495 | -0.234395344 | -0.0062    | 0.7049     |
| magnesium      | 1.014386356 | -0.247164696 | -0.27363779  | 0.0724     | 0          |
| potassium      | 1.085581902 | -0.172445537 | -0.156950175 | 0.1245     | 0          |
| sodium         | 0.855535132 | -0.232549416 | -0.294388229 | 0.0348     | 0.0321     |
| protein        | 1.060425525 | 0.081799092  | 0.158684273  | -0.174     | 0          |
| albumin        | 1.483055751 | -0.099160787 | -0.1658659   | 0.1694     | 0          |
| lactate_dehyd  | 1.030964085 | 0.278172724  | 0.349802143  | 0.0569     | 0.0005     |
| fe             | 0.284169435 | 0.069194108  | 0.161588711  | 0.0711     | 0          |
| folate         | 1.01908559  | -0.347761515 | -0.395825412 | -0.153     | 0          |
| vitb12         | 0.68048255  | 0.210685065  | 0.250487898  | 0.0167     | 0.3042     |
| urea           | 0.184117359 | 0.016735013  | 0.092672974  | 0.0232     | 0.1537     |
| bp_systolic    | 0.360608237 | -0.090954638 | -0.030263888 | 0.054      | 0.0009     |
| bp_diastolic   | 0.25862312  | -0.052688697 | -0.002816418 | 0.0187     | 0.2499     |
| pulse_bpm      | 0.184233976 | 0.054743841  | 0.098897524  | -0.0178    | 0.2729     |
| axillary_temp  | 0.119267524 | -0.040092546 | -0.047470303 | -0.0629    | 0.0001     |
| waist_circum   | 0.48866493  | 0.072102588  | 0.272087378  | 0.1428     | 0          |
| arm_right      | 0.298813158 | 0.019073876  | 0.181171301  | 0.1231     | 0          |
| triceps_skin   | 0.637425969 | 0.175520358  | 0.269077759  | 0.1369     | 0          |
| height_m       | 0.551861604 | -0.006890821 | 0.085447599  | 0.0606     | 0.0002     |
| bmi            | 0.40821976  | 0.091182126  | 0.229885639  | 0.1181     | 0          |

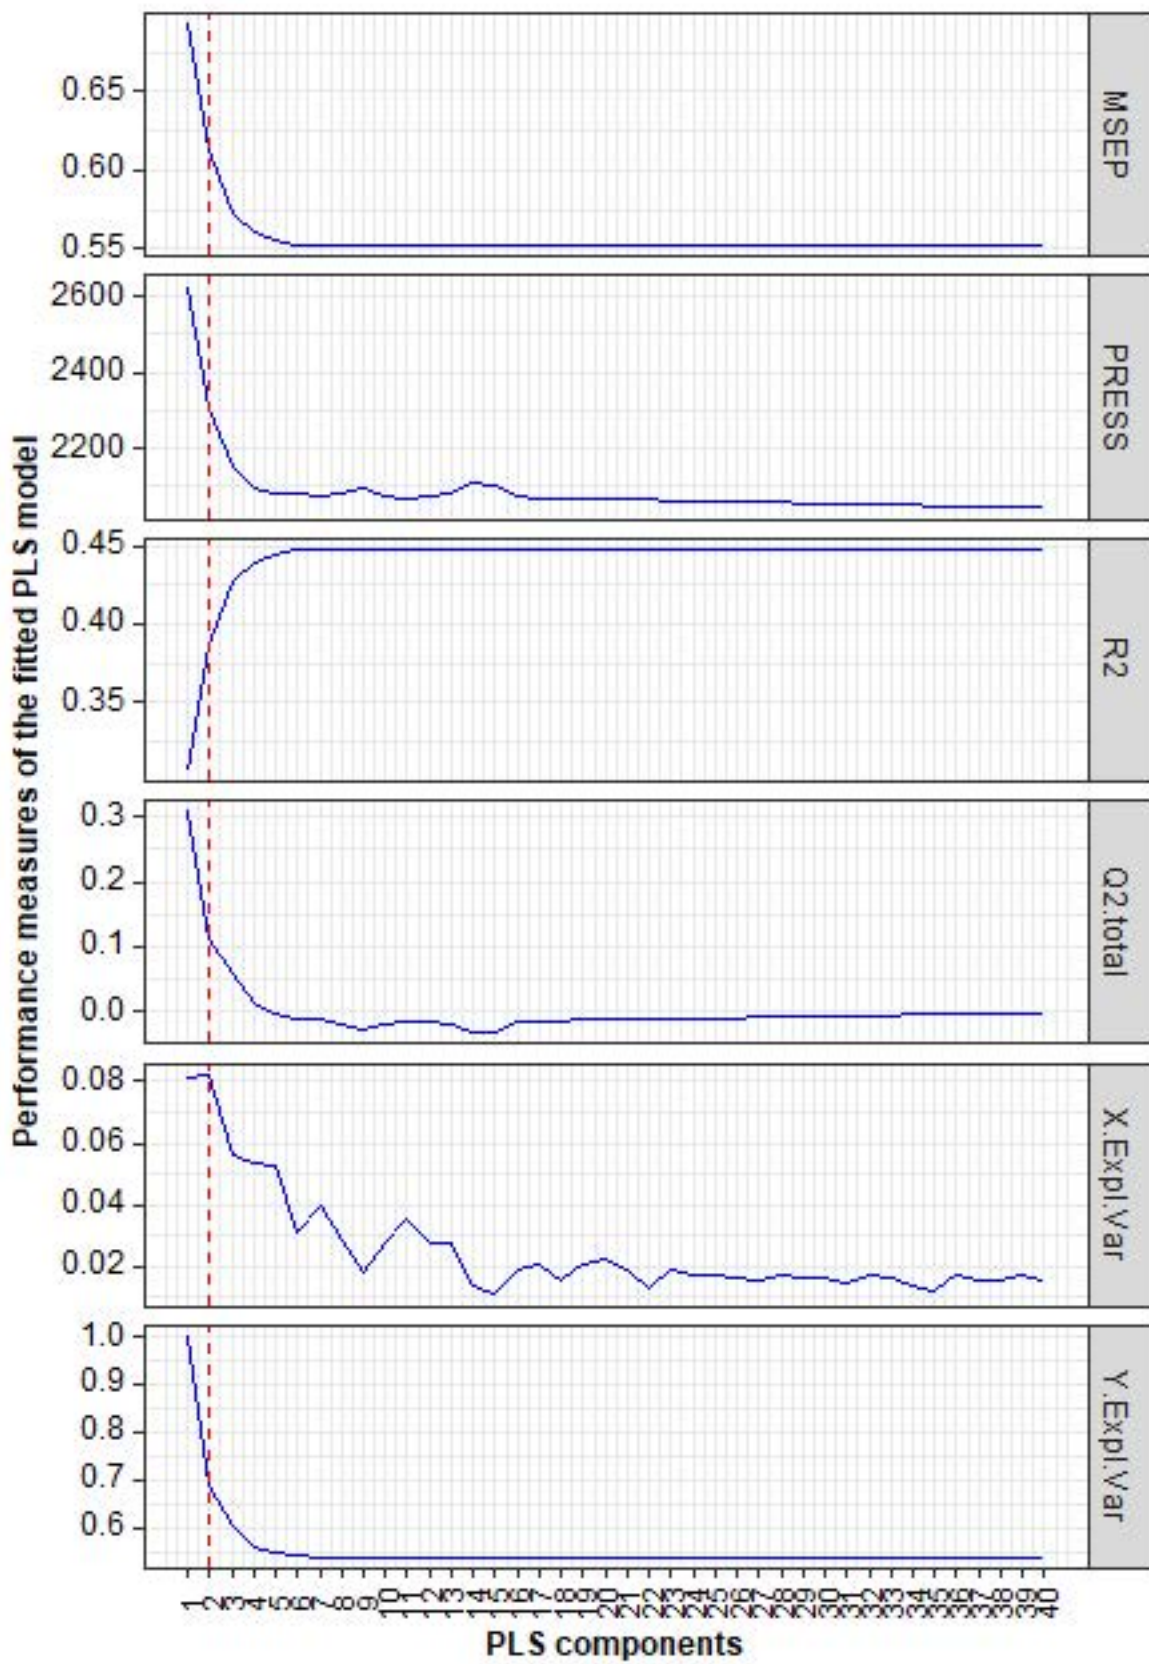

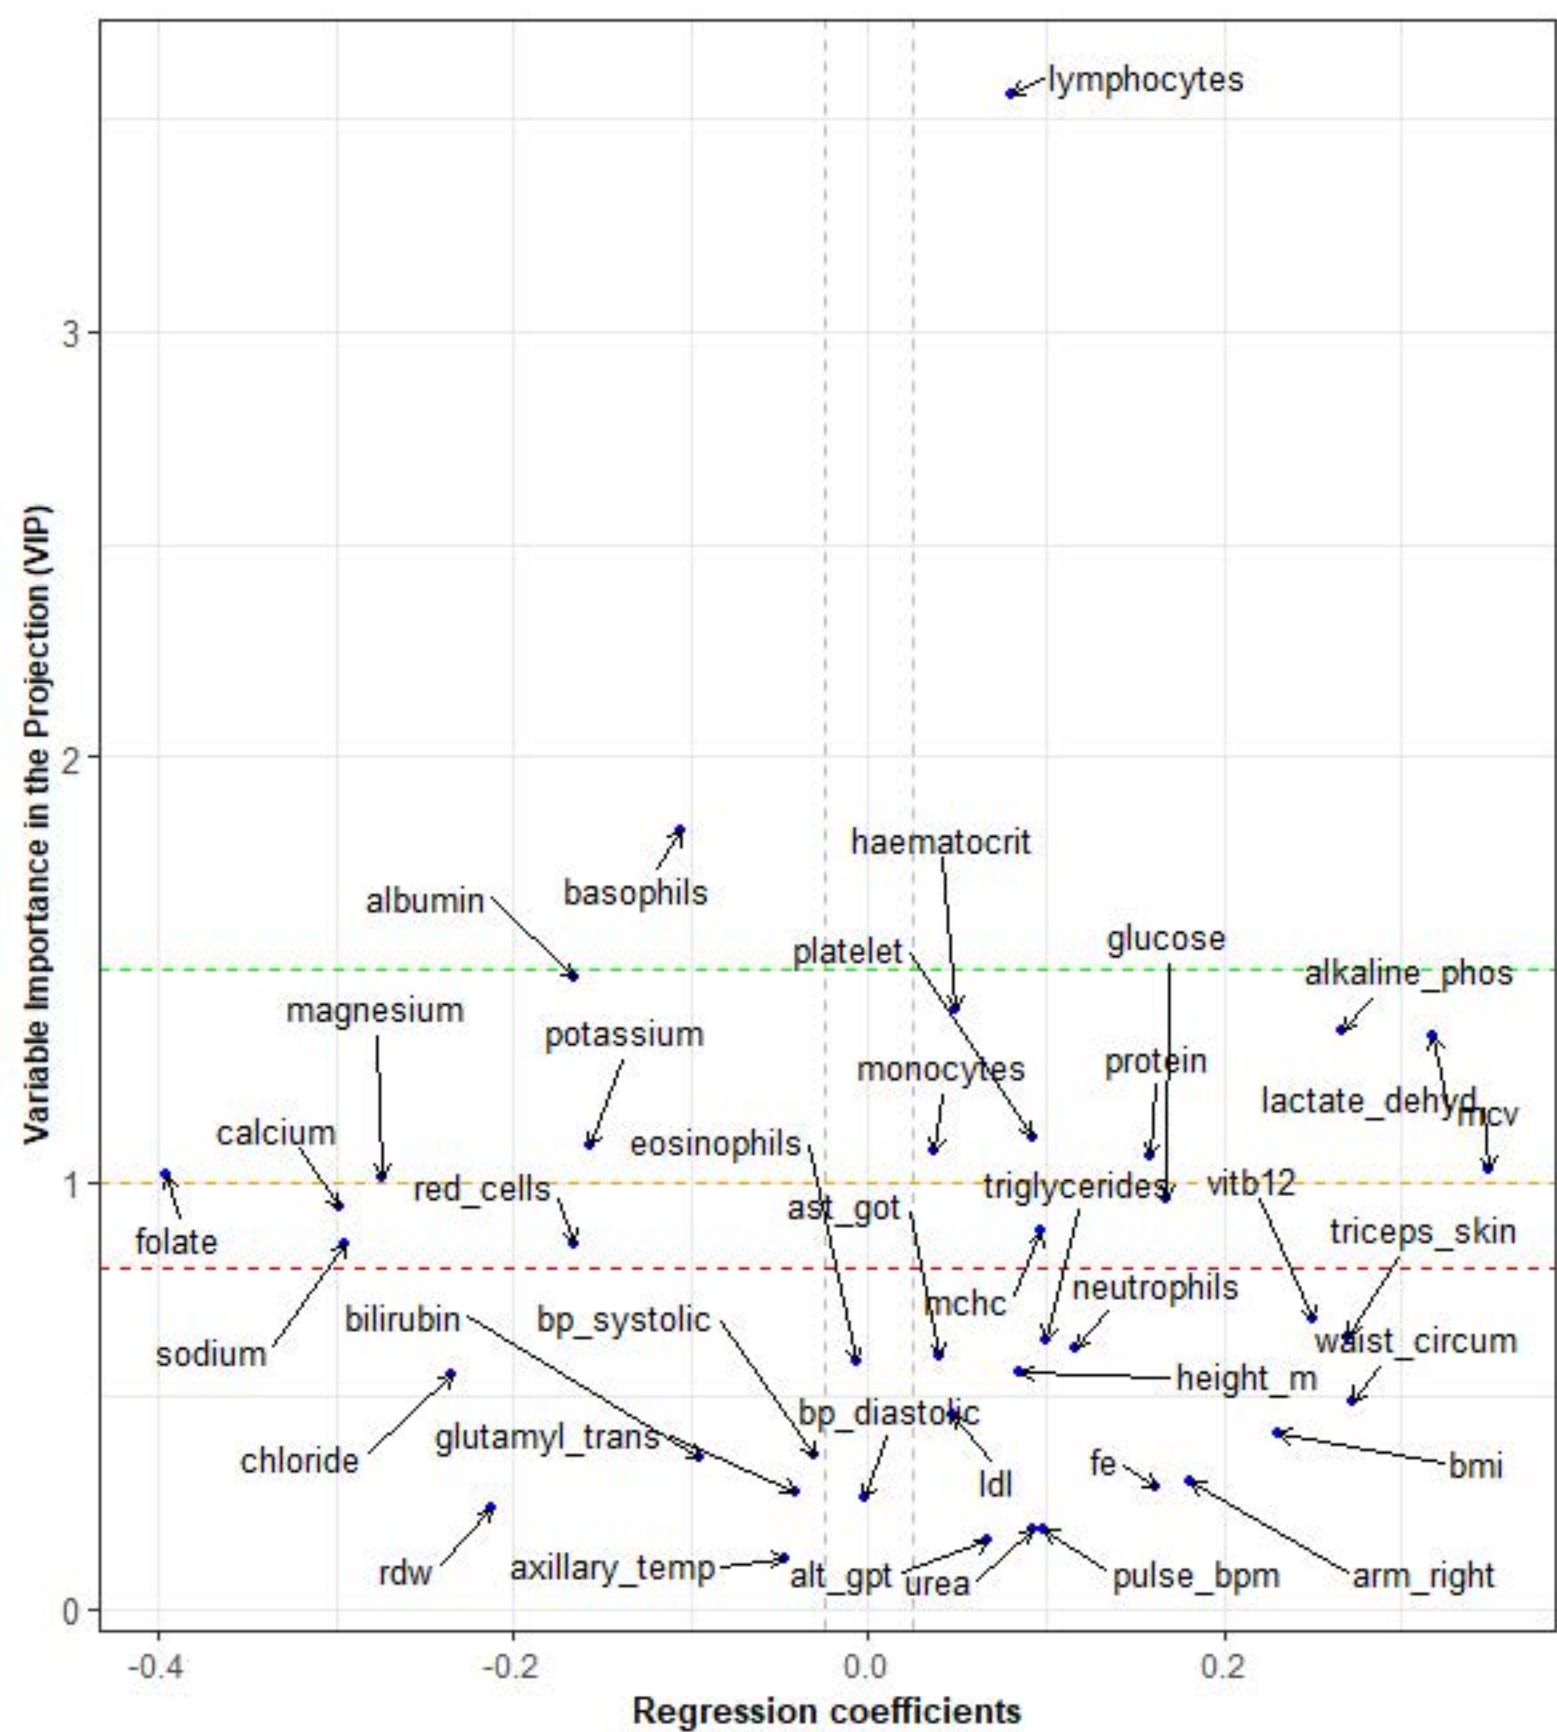

Supplement: MOESM1 [file 16466232]
